# Supplementary material for: Vascular uptake on 18F-sodium fluoride positron emission tomography: precursor of vascular calcification?
Source: PubMed Central journal article supplement (PMC8648691; doi:10.1007/s12350-020-02031-5), 2020-01-23

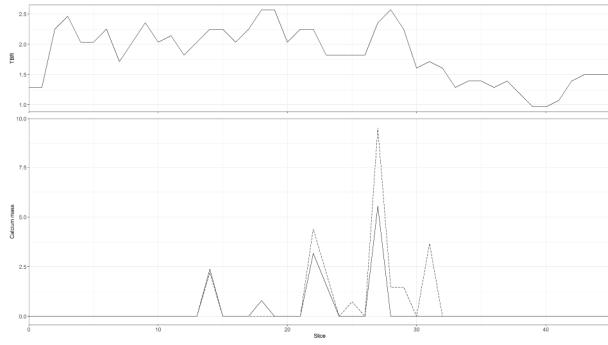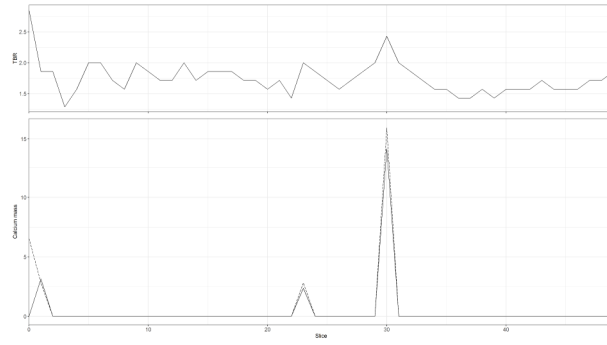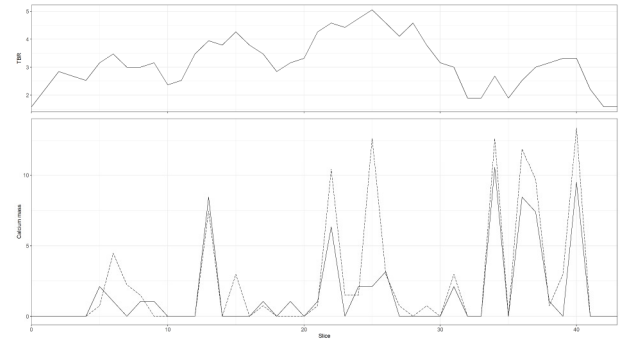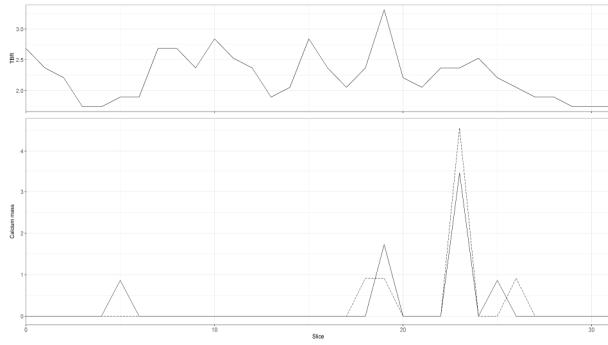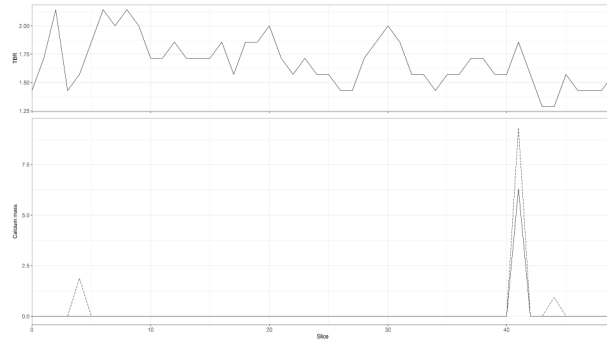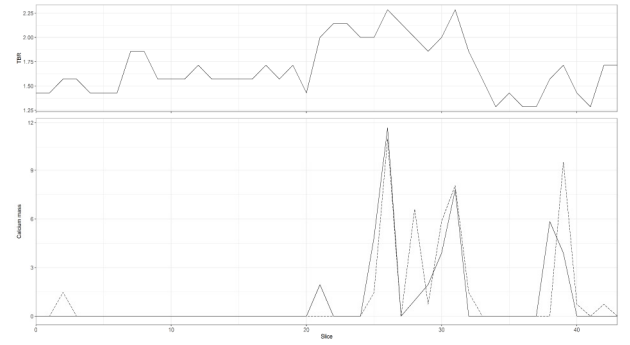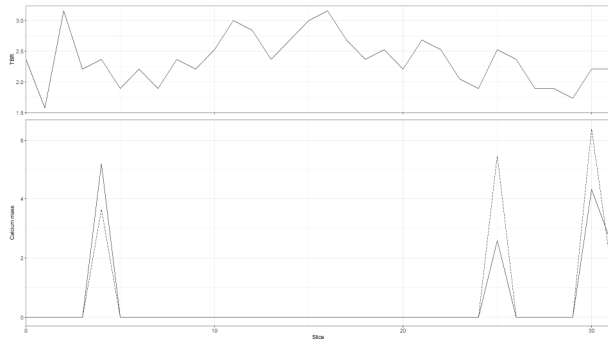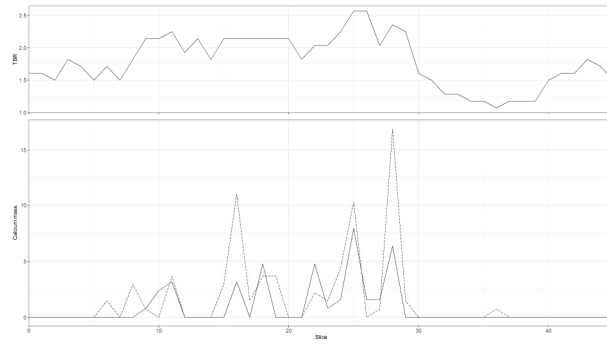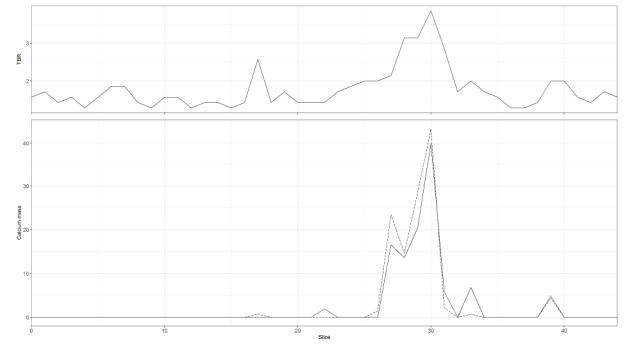

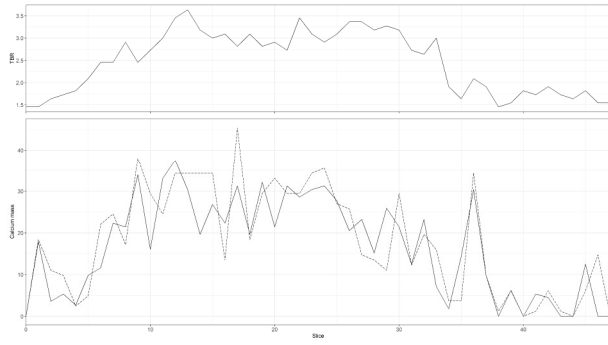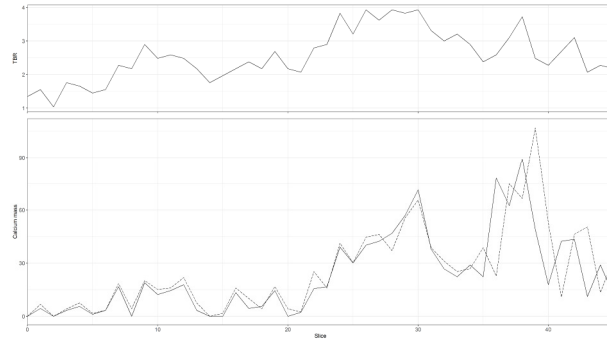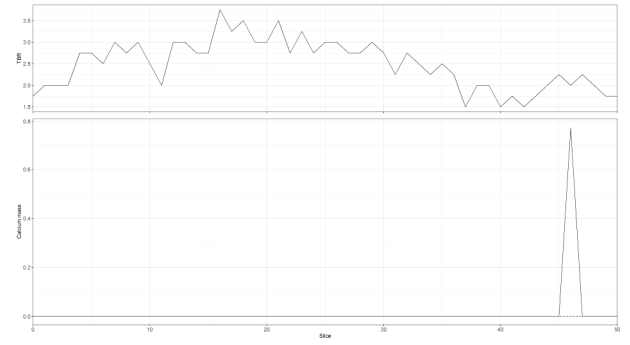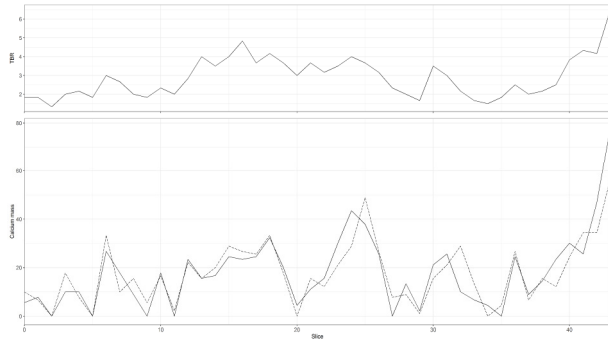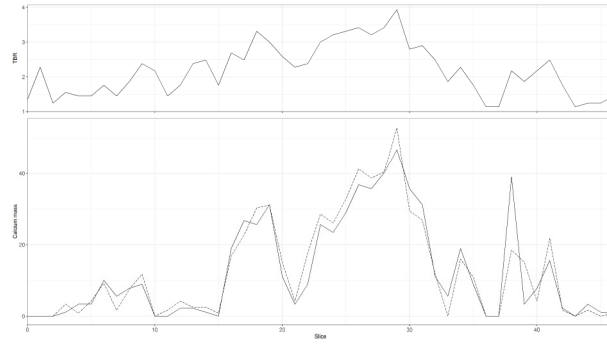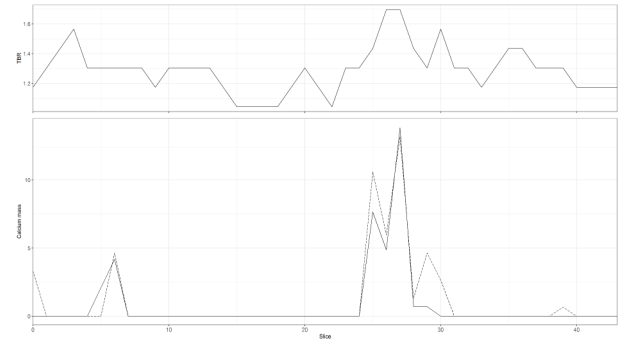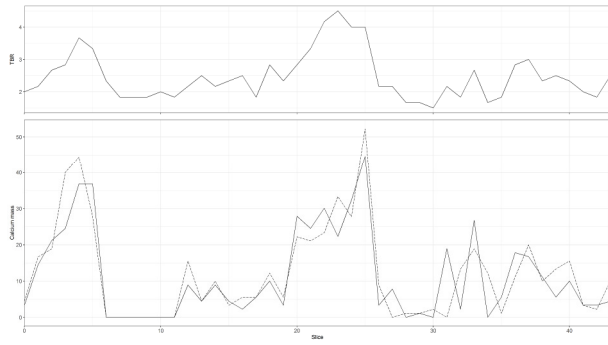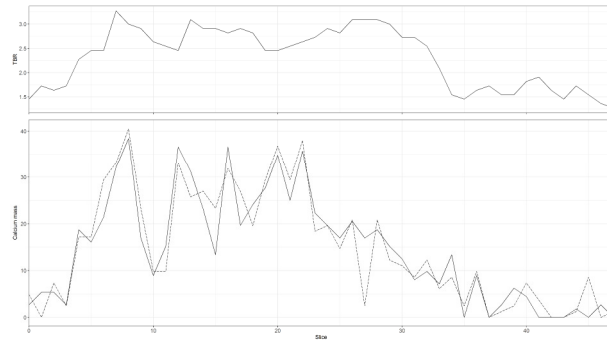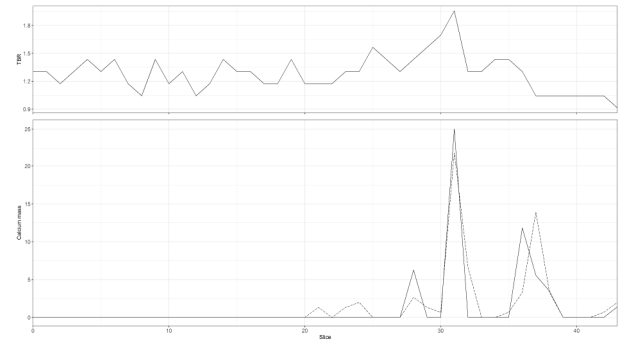

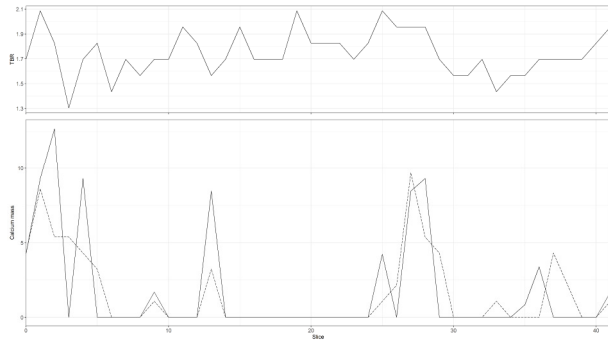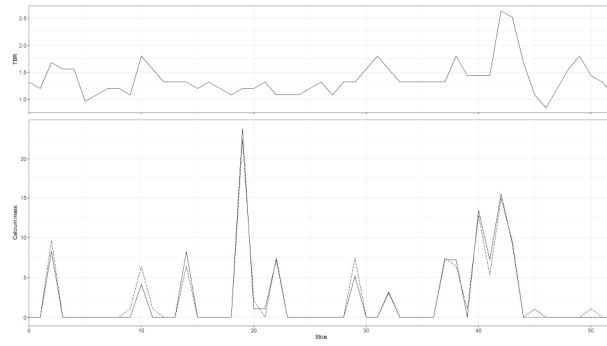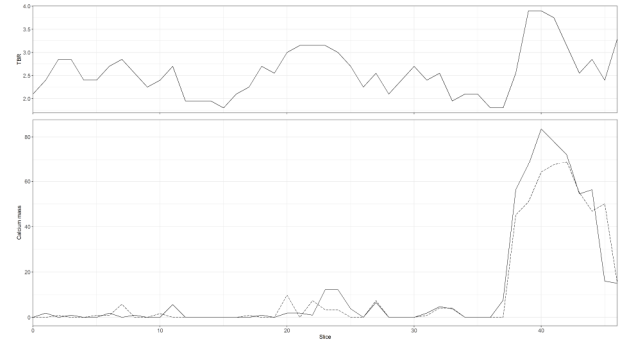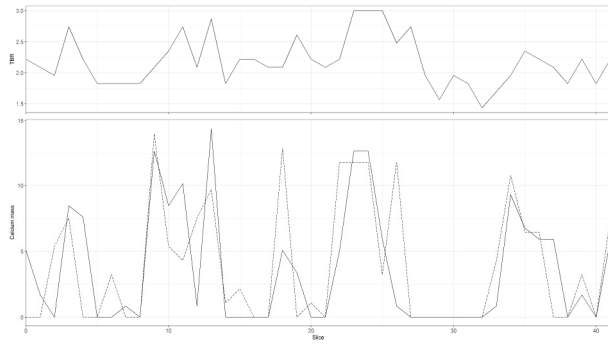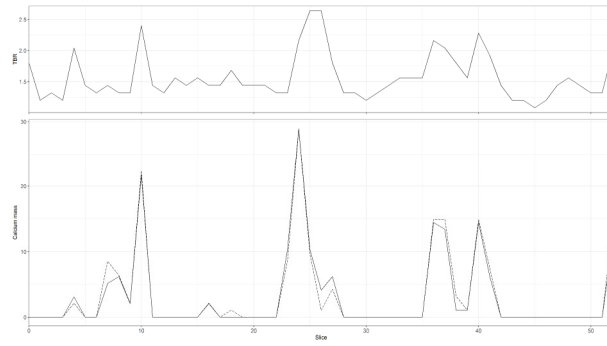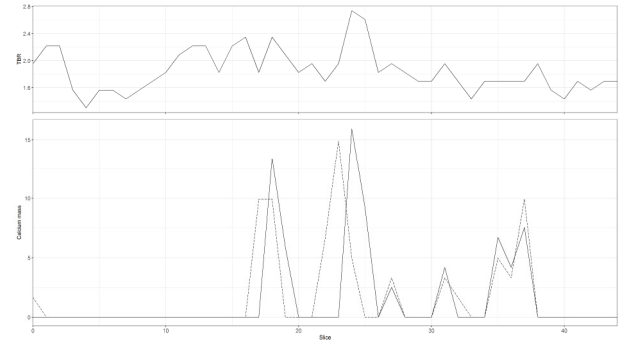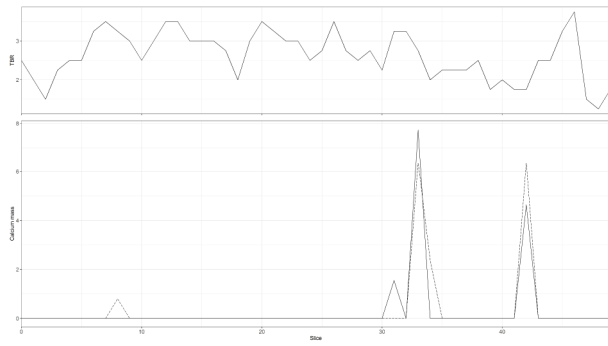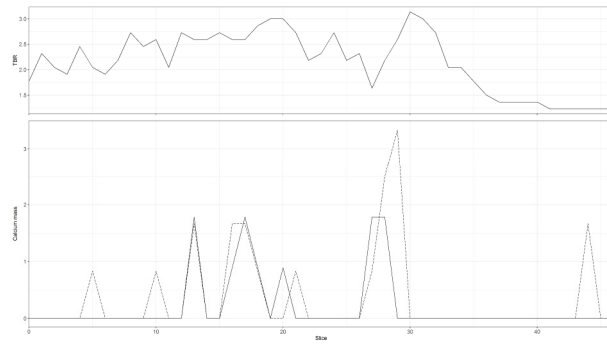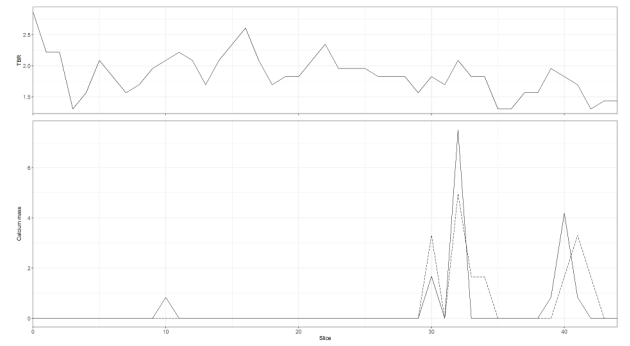

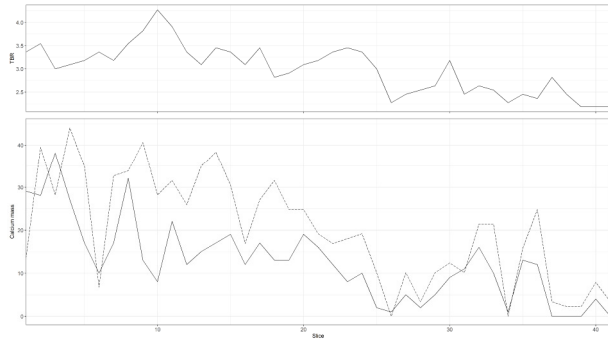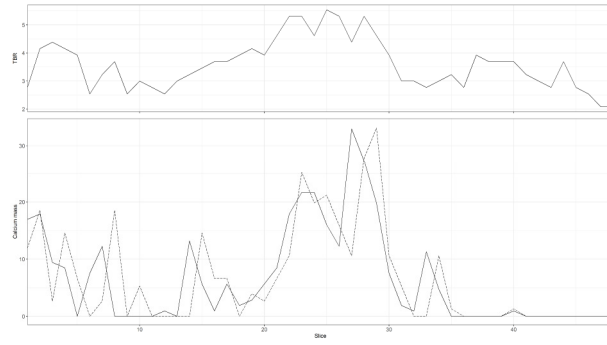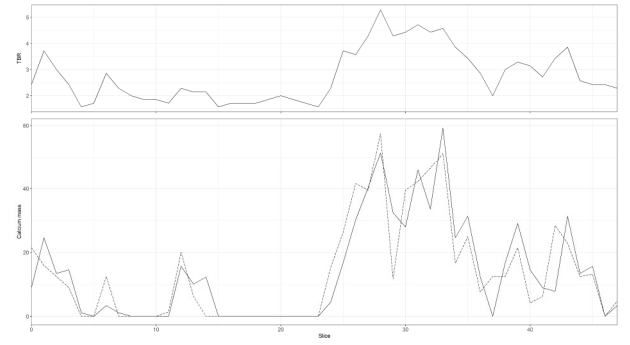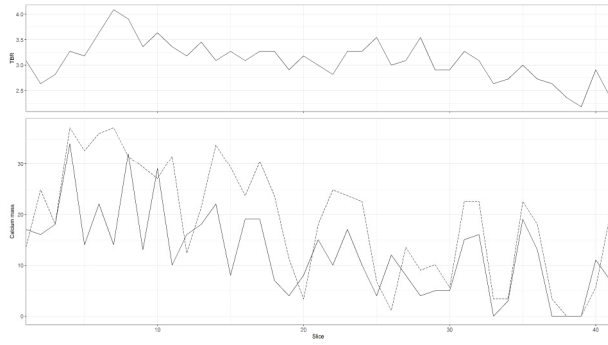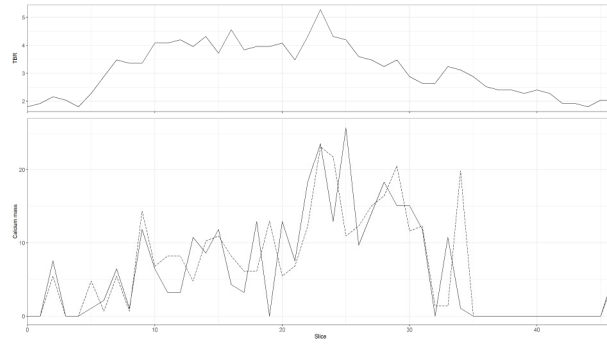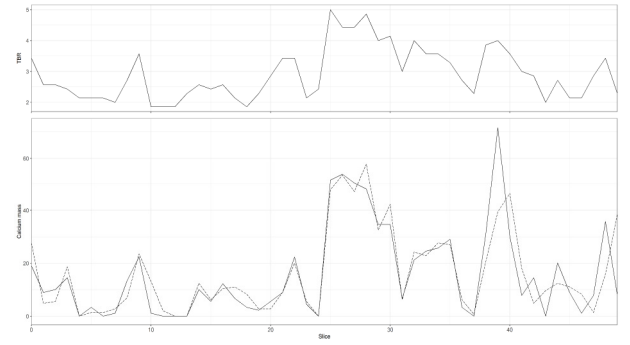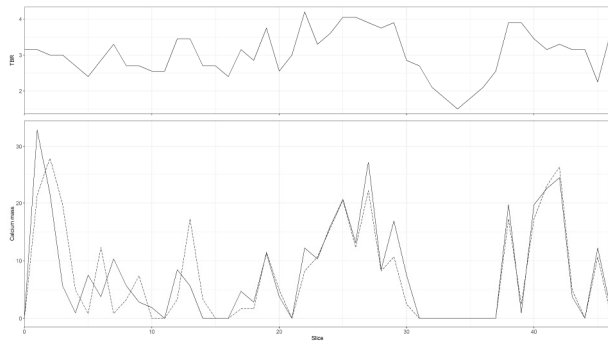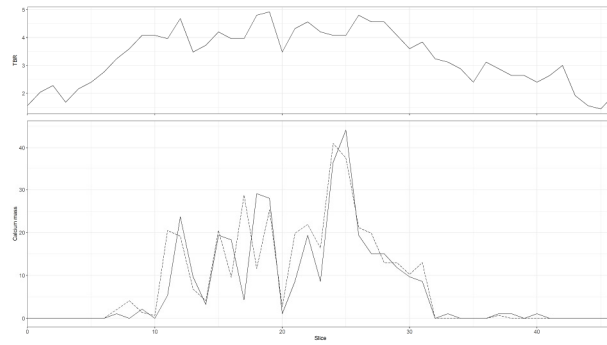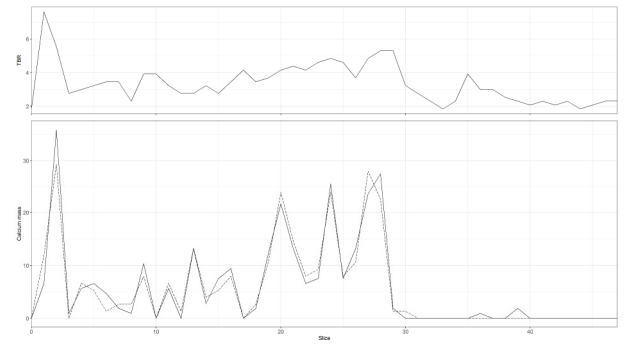

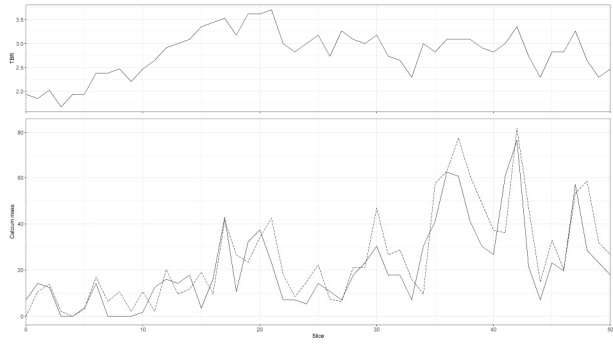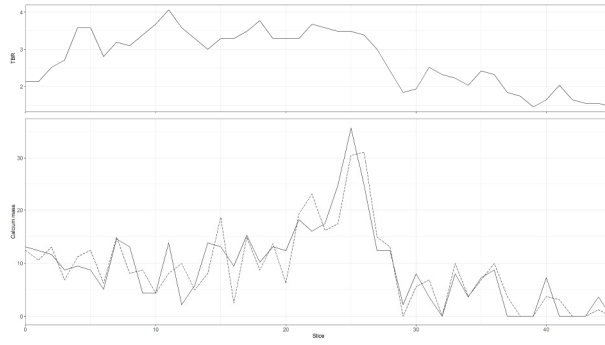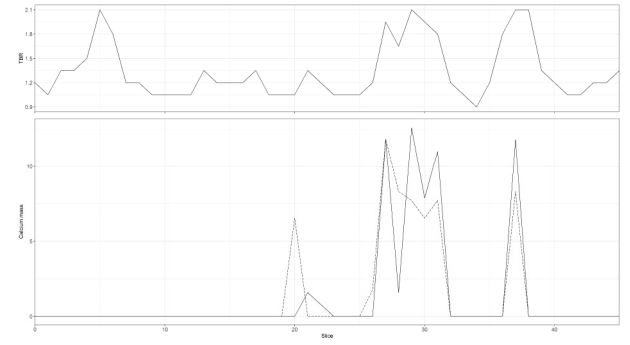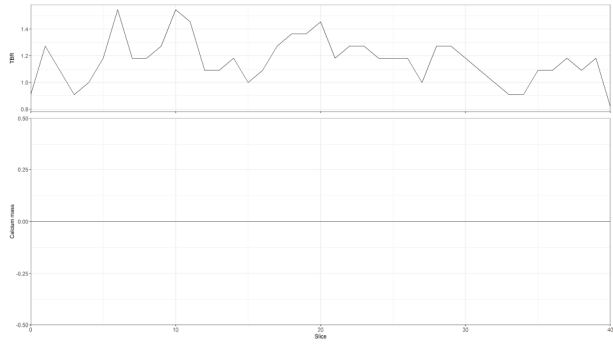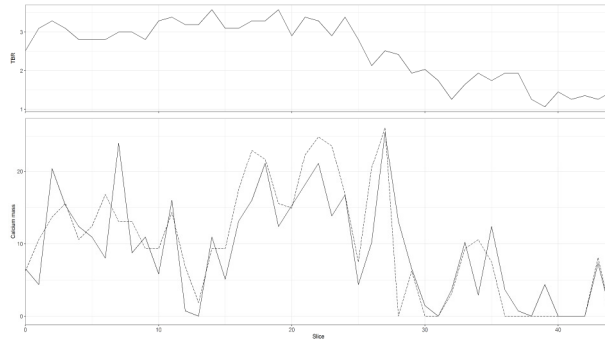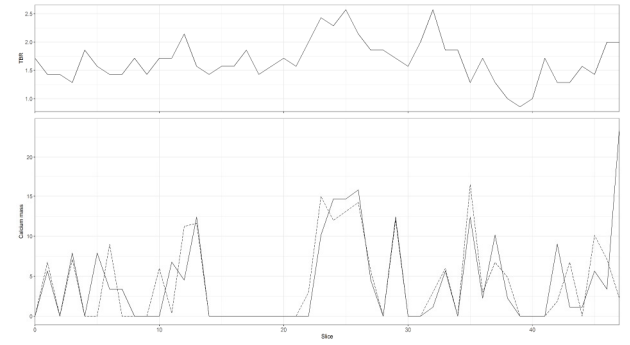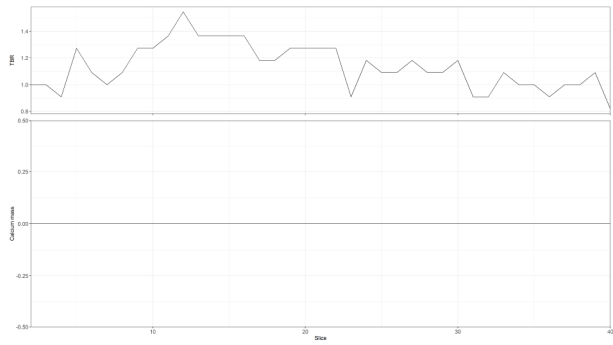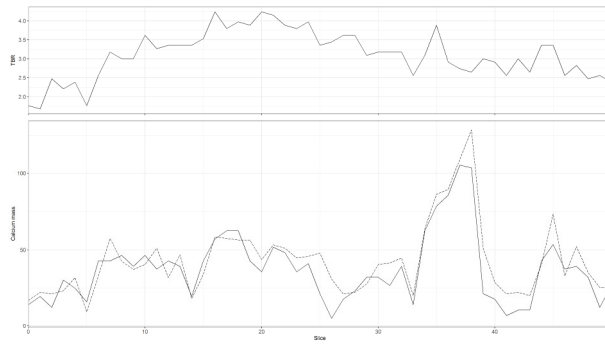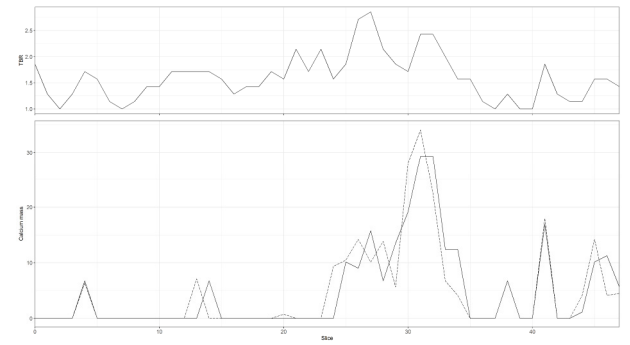

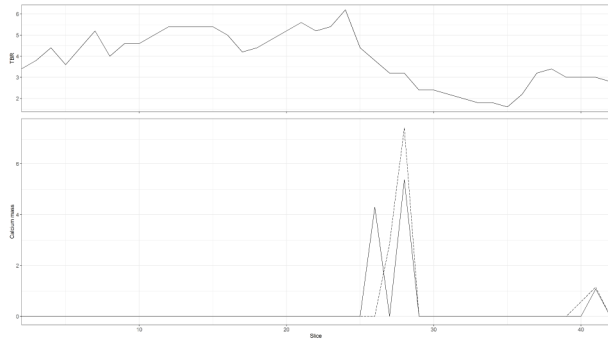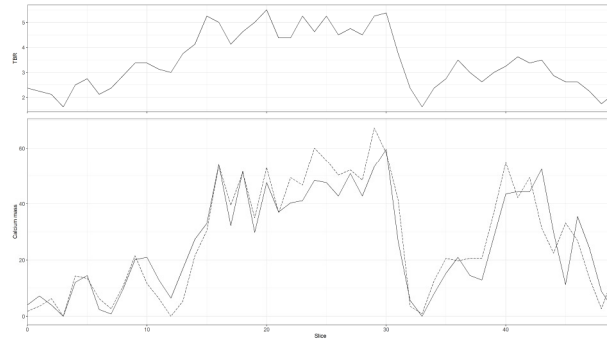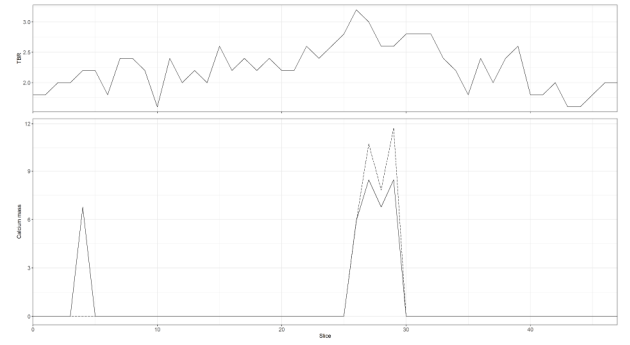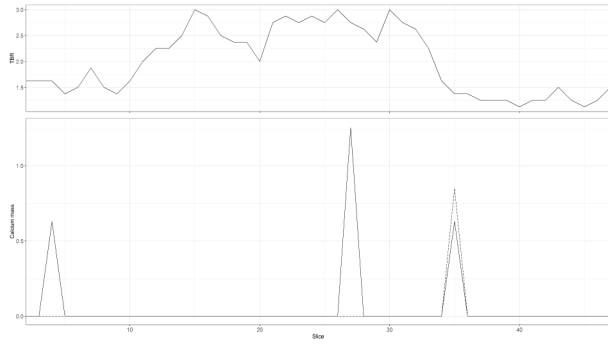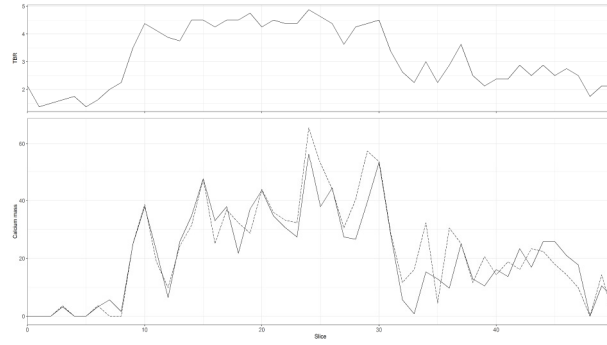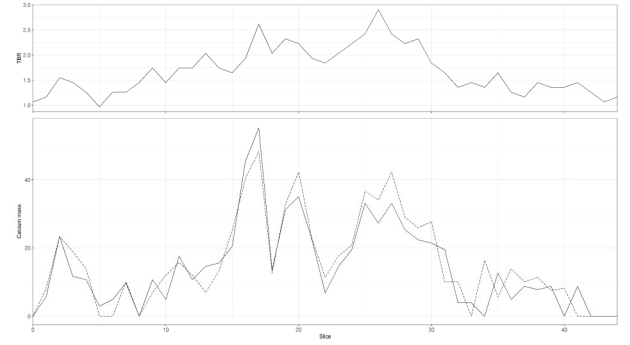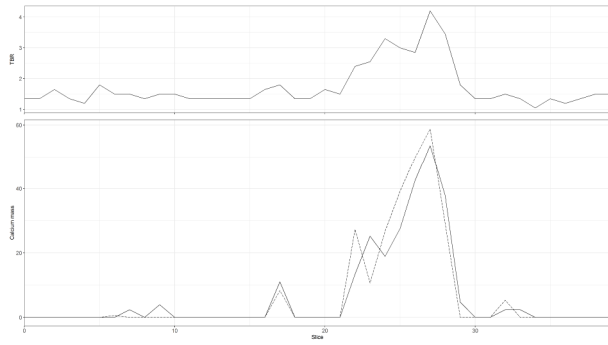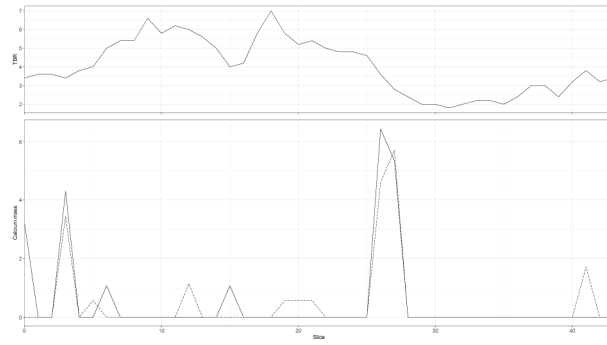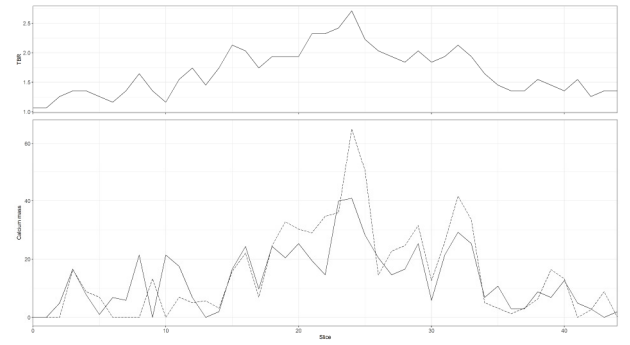

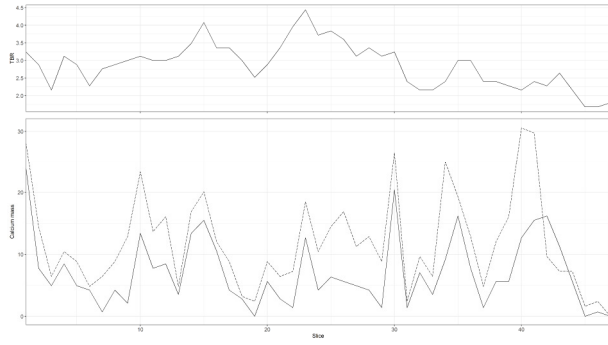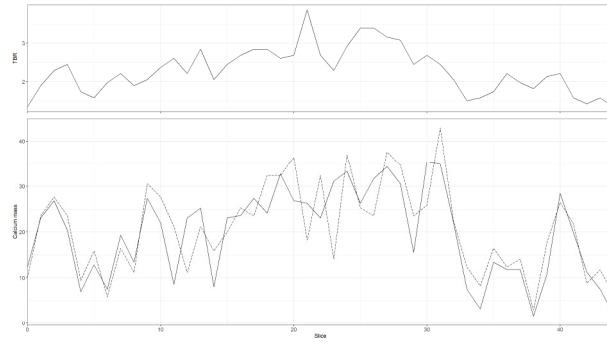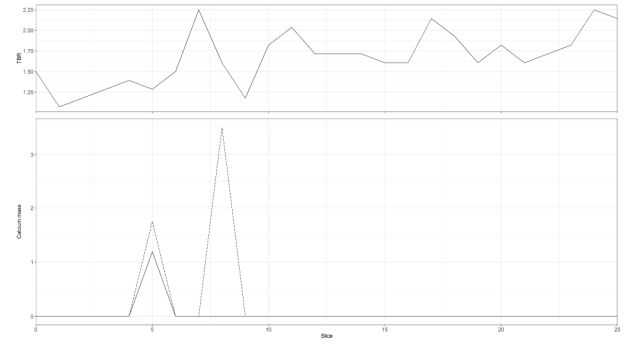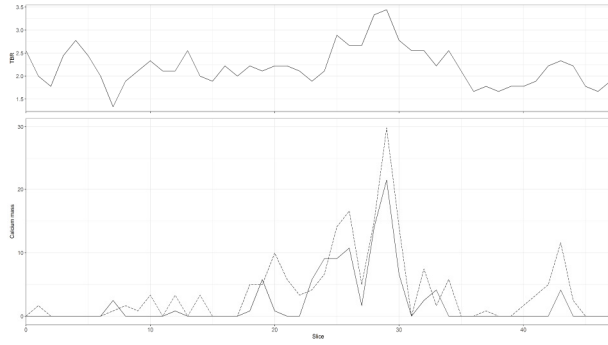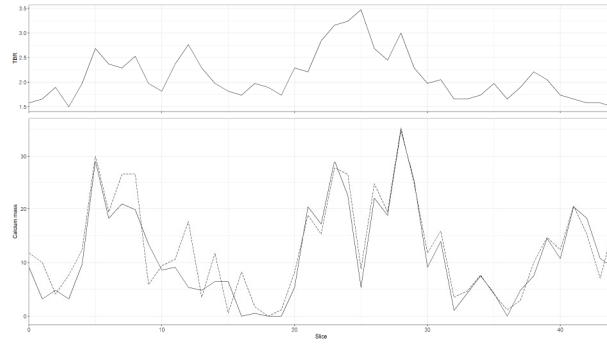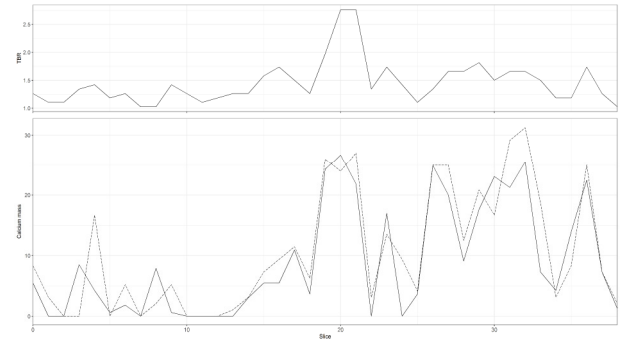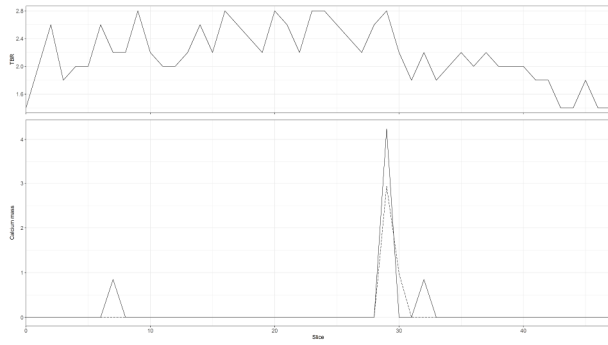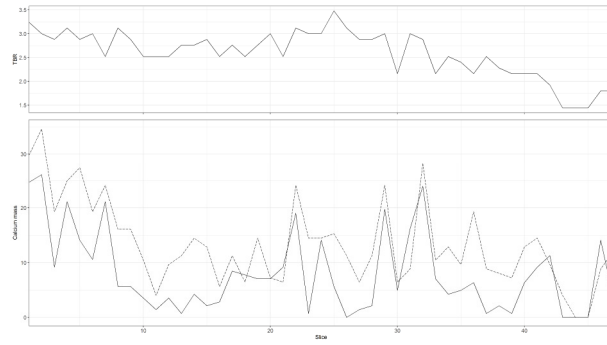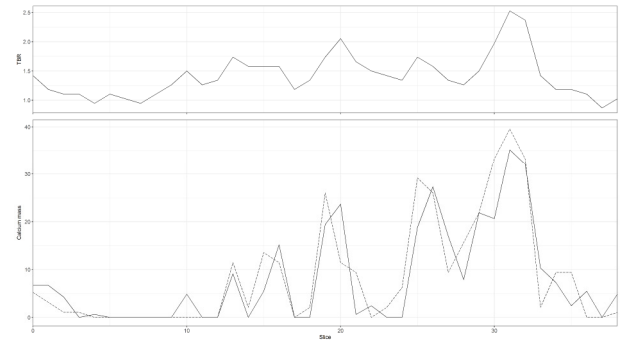

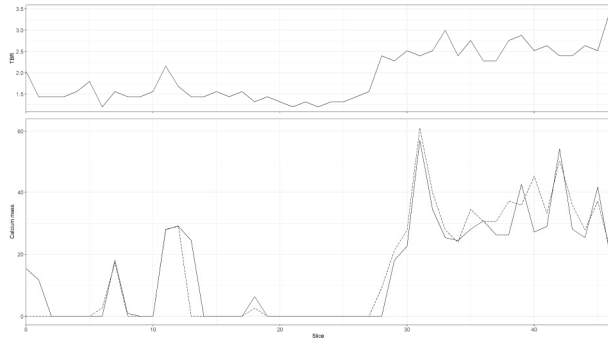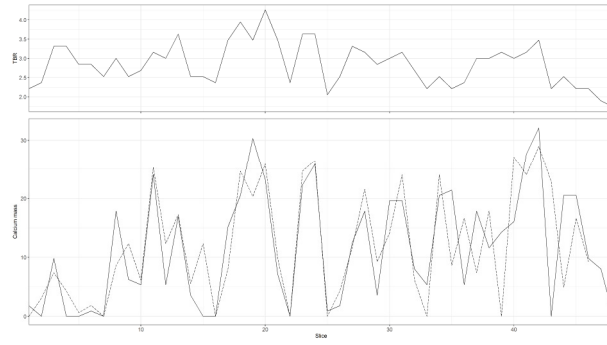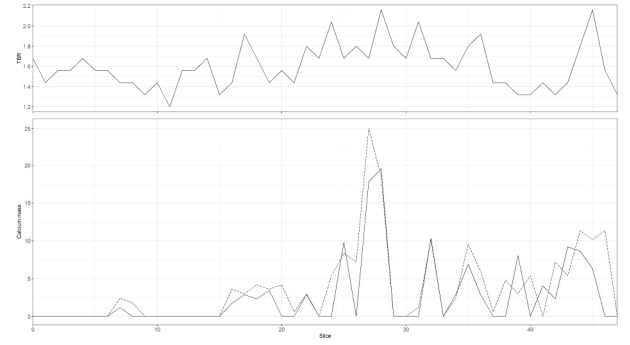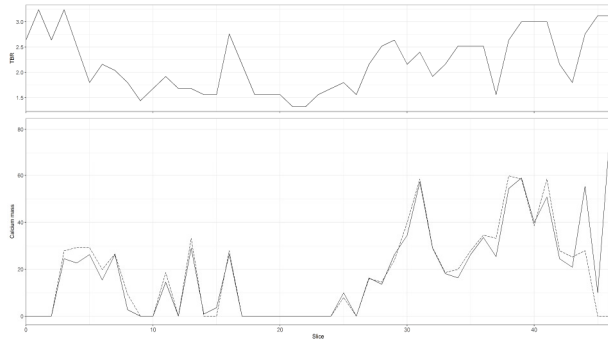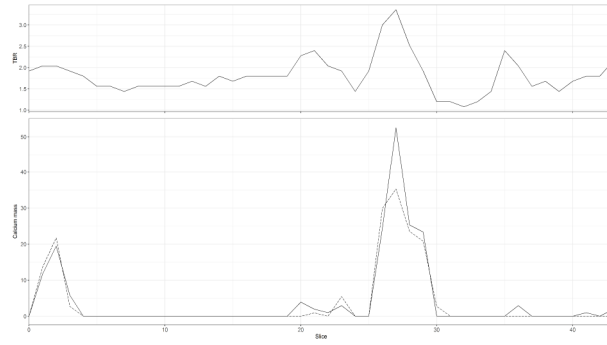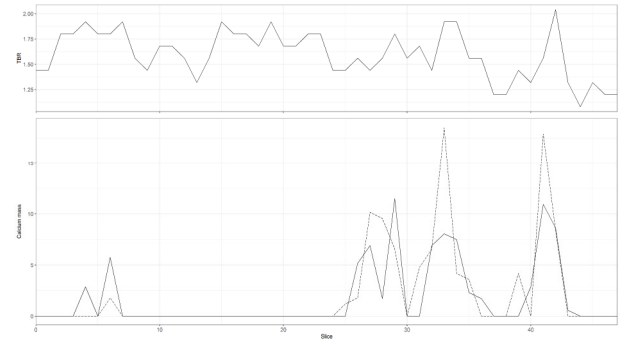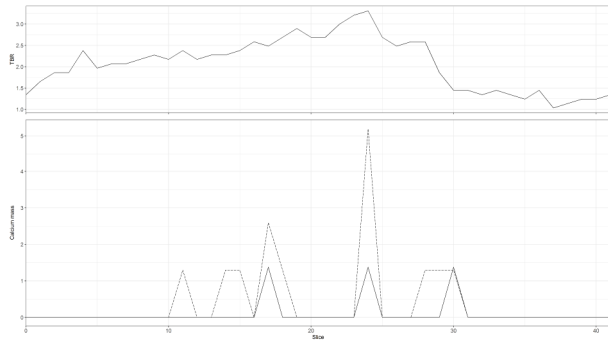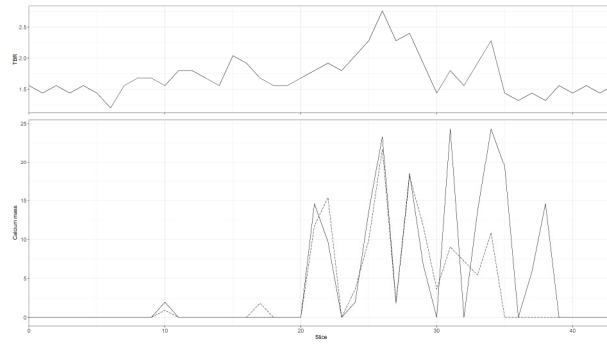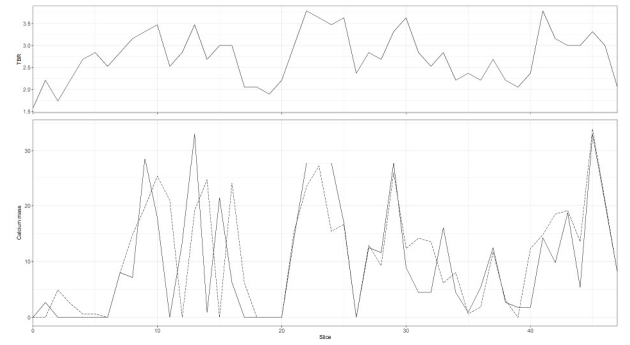



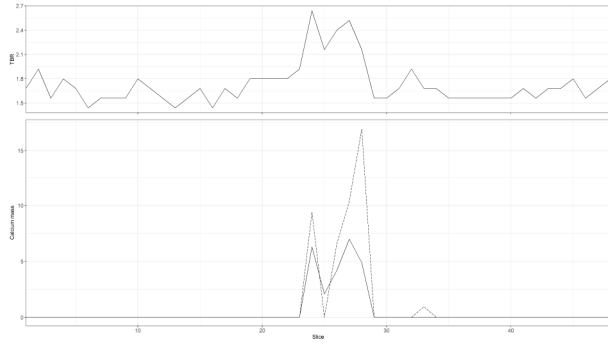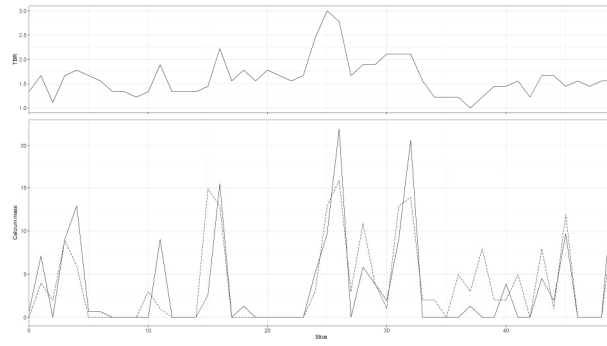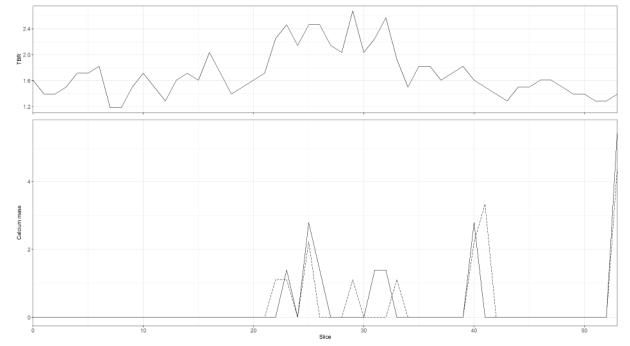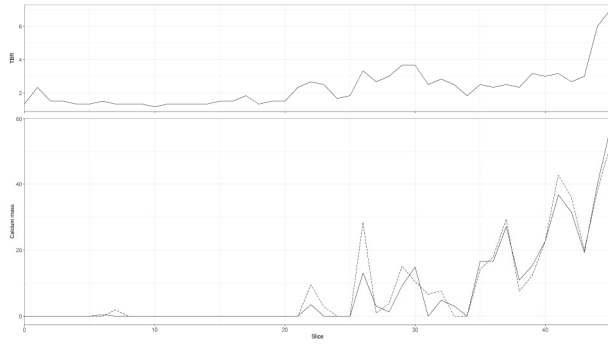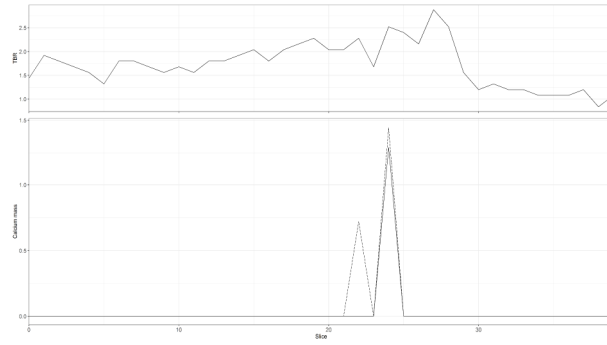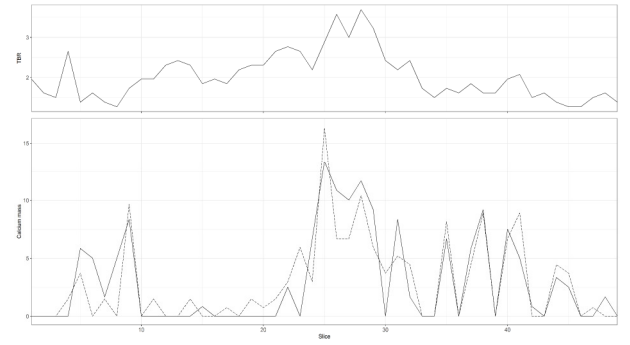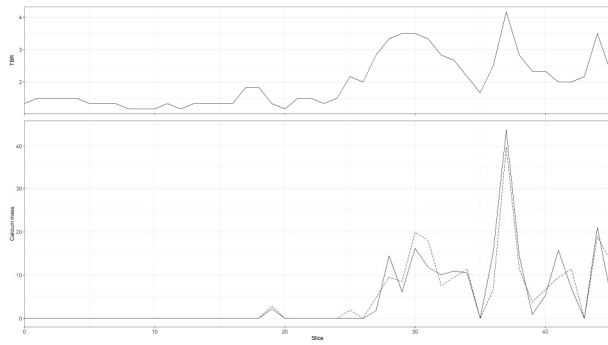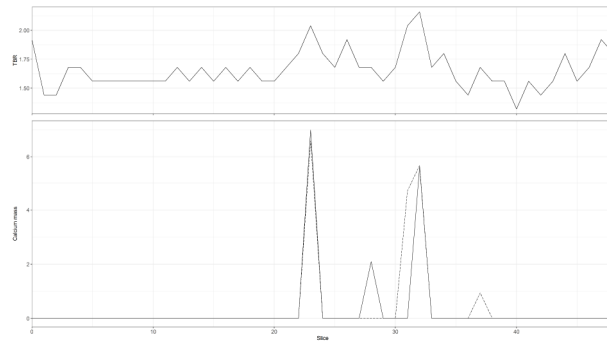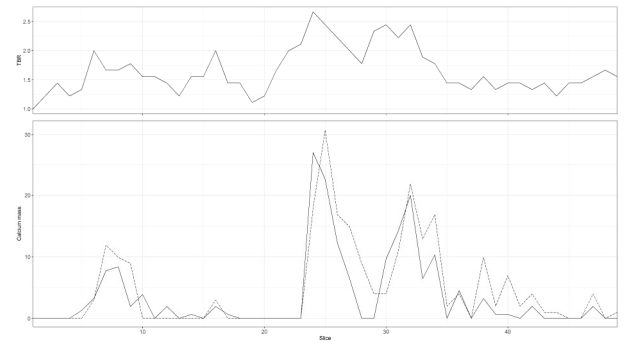

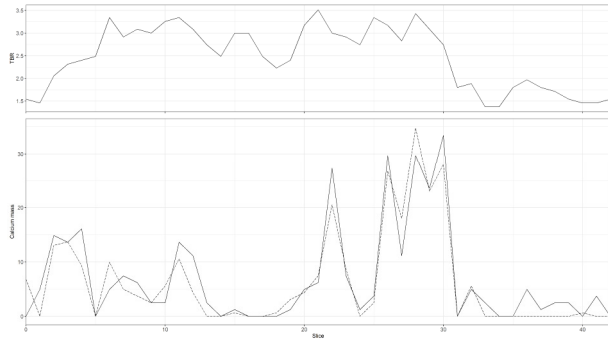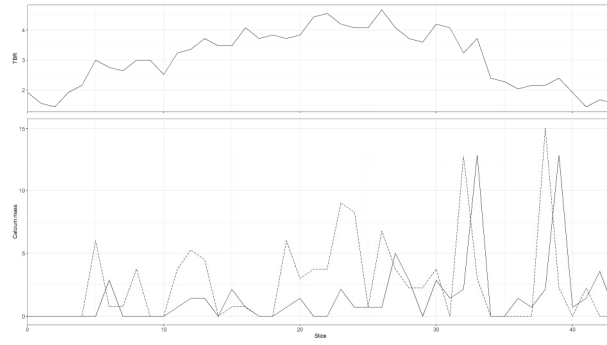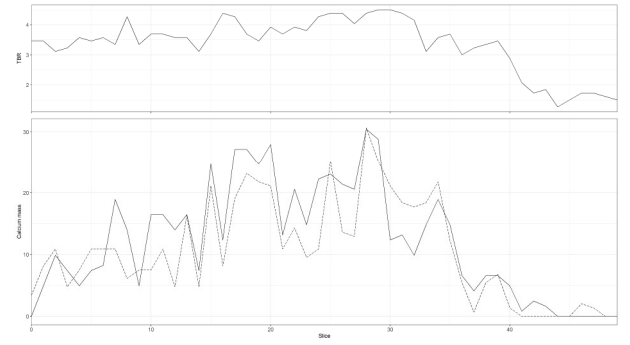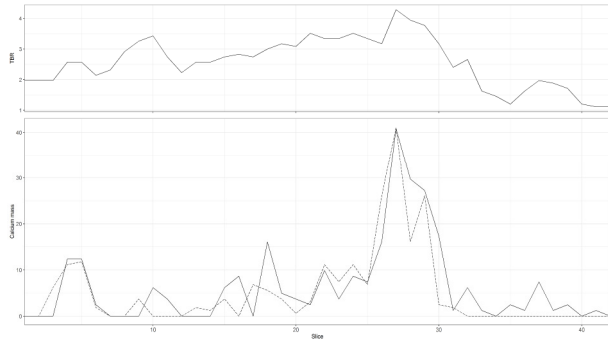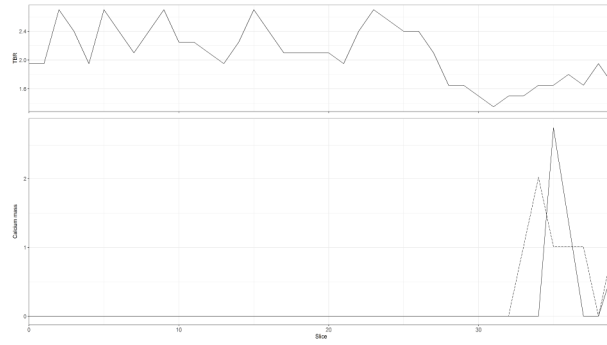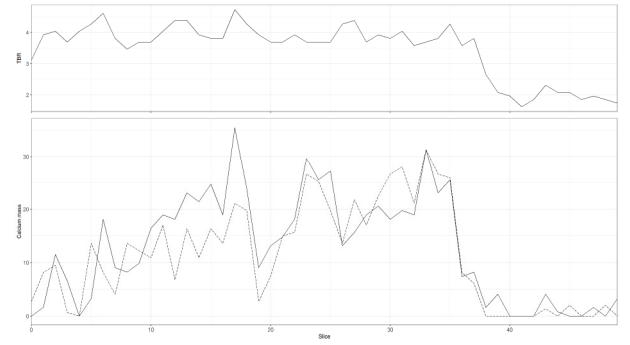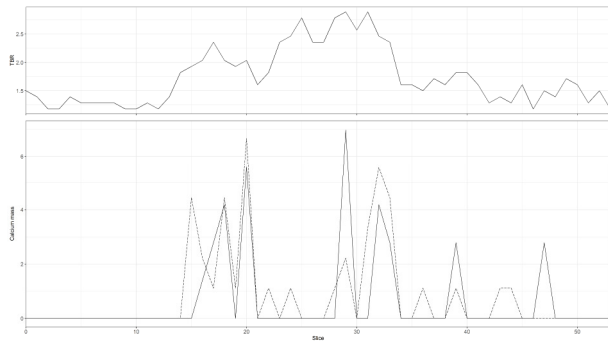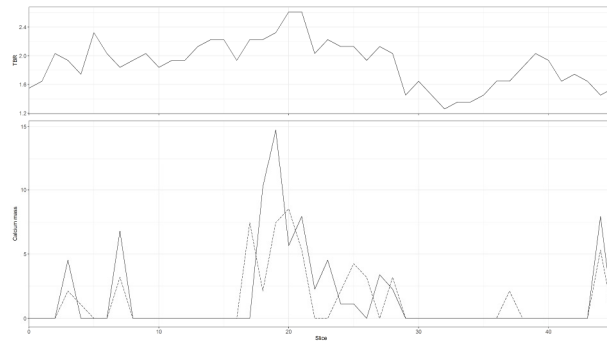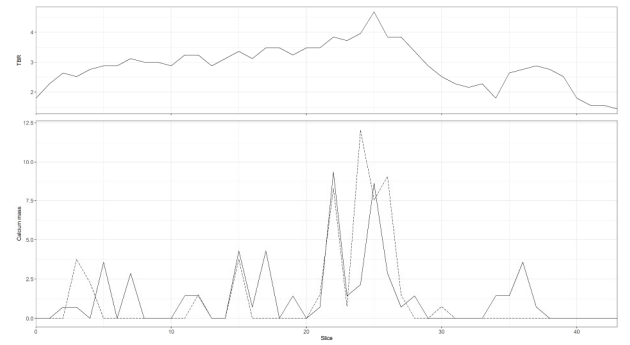

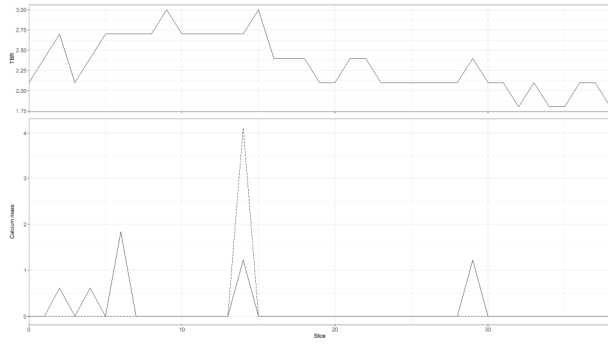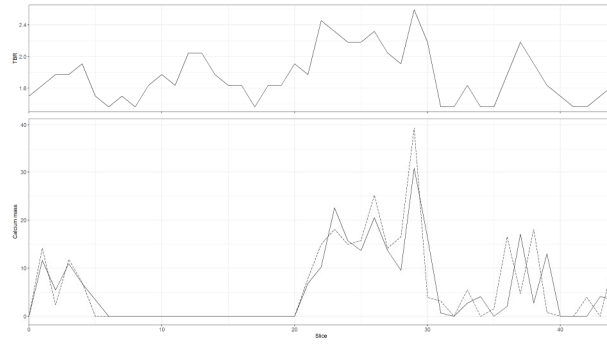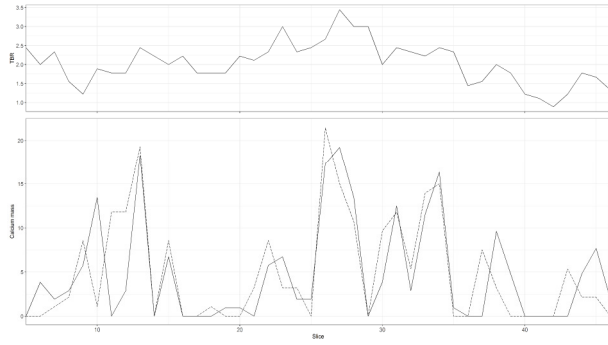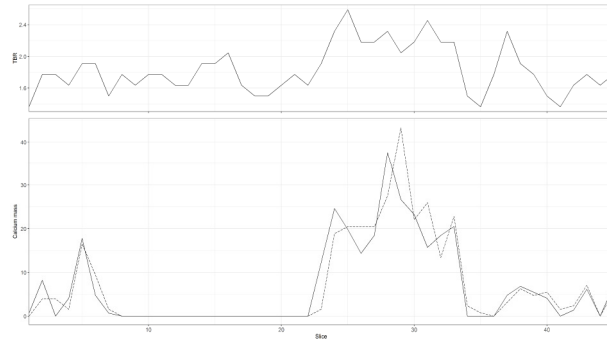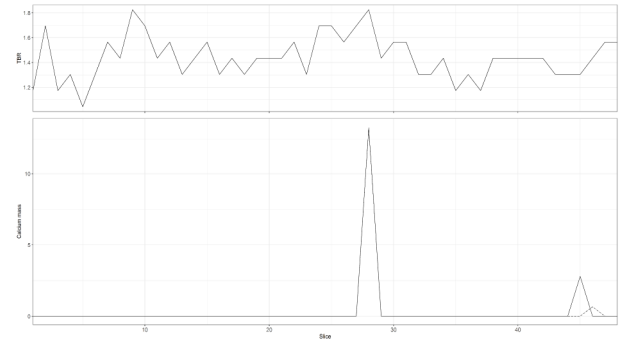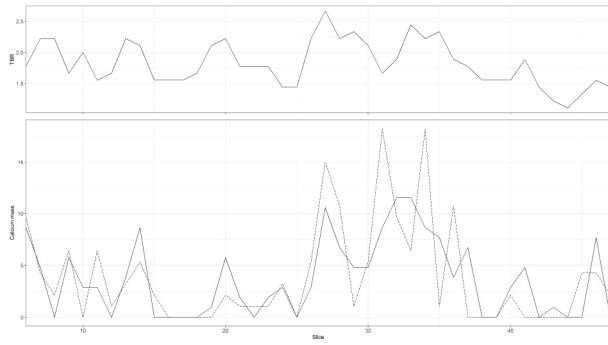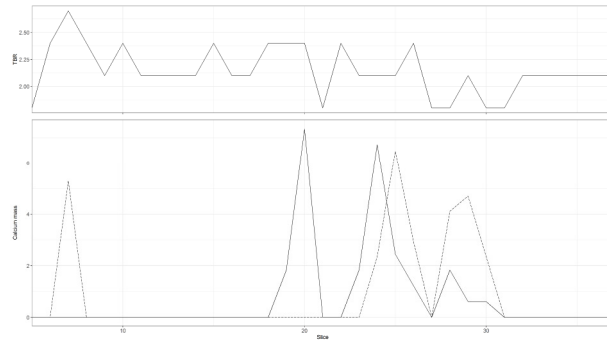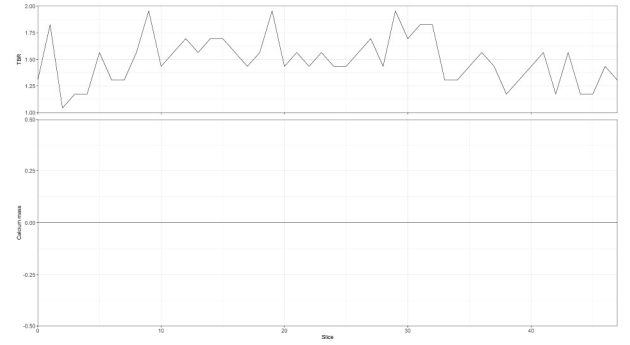

Supplement: 12350_2020_2031_MOESM2_ESM.pdf [file 12350_2020_2031_MOESM2_ESM.pdf]
